# Supplementary material
Source: PubMed Central journal article supplement (PMC5826850)
Supplement: NIHMS930073-supplement-supplement_1.pdf [file NIHMS930073-supplement-supplement_1.pdf]

**eTable 1.** Baseline Characteristics of Patients with Gastrogastric Fistula who Developed and Did Not Develop Diabetes Mellitus Recurrence.

|                                                  | <b>DM recurrence<br/>(N = 20)</b> | <b>No DM recurrence<br/>(N = 22)</b> | <b>p<br/>Value</b> |
|--------------------------------------------------|-----------------------------------|--------------------------------------|--------------------|
| Sex, female, n (%)                               | 14 (70)                           | 17 (77)                              | 0.59               |
| Age, y, mean $\pm$ SD                            | 54.3 $\pm$ 8.1                    | 49.6 $\pm$ 8.0                       | 0.06               |
| Amount of weight regain, %, mean $\pm$ SD        | 31.1 $\pm$ 27.8                   | 20.5 $\pm$ 13.7                      | 0.12               |
| Hemoglobin A1c prior to RYGB, %, mean $\pm$ SD   | 7.5 $\pm$ 1.3                     | 7.6 $\pm$ 2.0                        | 0.92               |
| Duration of T2DM prior to RYGB, y, mean $\pm$ SD | 4.9 $\pm$ 4.9                     | 3.4 $\pm$ 3.1                        | 0.16               |
| Insulin use prior to RYGB (%)                    | 50.0                              | 14.3                                 | 0.12               |
| Large fistula size, $\geq$ 10 mm (%)             | 78.6                              | 30.8                                 | 0.01               |

DM, diabetes mellitus; RYGB, Roux-en-Y gastric bypass; T2, type 2.
